# Supplementary material for: The Spike D614G mutation increases SARS-CoV-2 infection of multiple human cell types
Source: bioRxiv or medRxiv preprint supplement (doi:10.1101/2020.06.14.151357), 2020-07-07
Supplement: Supplementary file [file media-1.pdf]

*Supplementary materials*

**The D614G mutation in SARS-CoV-2 Spike increases transduction of multiple human cell types**

Zharko Daniloski<sup>1,2</sup>, Xinyi Guo<sup>1,2</sup>, Neville E. Sanjana<sup>1,2,\*</sup>

1. New York Genome Center, New York, NY, USA.
  2. Department of Biology, New York University, New York, NY, USA.
- \* E-mail: [neville@sanjanalab.org](mailto:neville@sanjanalab.org)

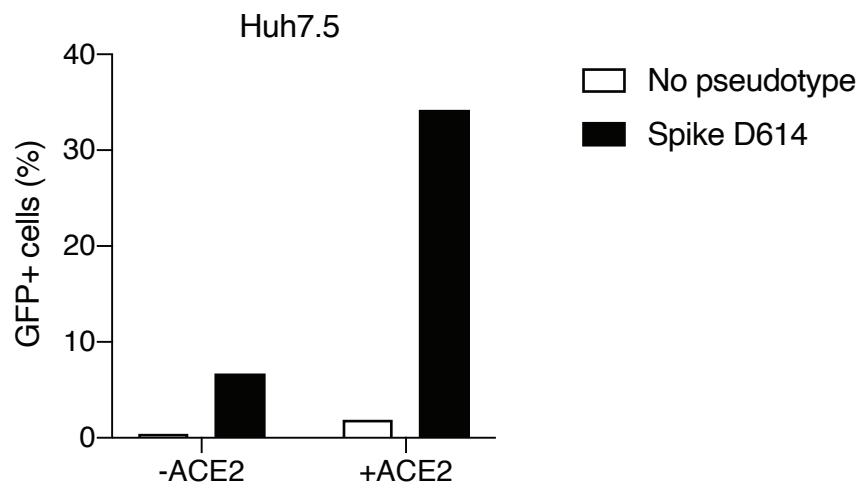

**Supplementary Figure 1. Increased transduction of SARS-CoV-2 Spike pseudotyped lentivirus in human cells that constitutively overexpress the human ACE2 receptor.** Percent of EGFP+ cells at 6 days post-transduction with 100  $\mu$ L of supernatant SARS-CoV-2 spike (D614) pseudotyped lentivirus and unpseudotyped lentivirus in human liver Huh7.5 with and without ACE2 overexpression.

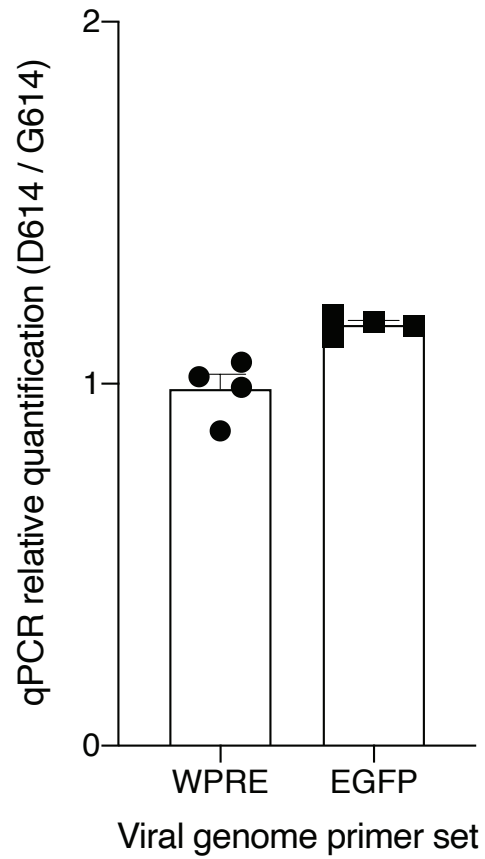

**Supplementary Figure 2. Quantitative PCR of viral RNA from SARS-CoV-2 Spike pseudotyped lentiviruses.** Relative quantification ( $\Delta\Delta C_t$ ) of viral RNA from SARS-CoV-2 Spike pseudotyped lentiviruses. The primers amplify the Woodchuck Hepatitis Virus posttranscriptional regulatory element (WPRE) or the EGFP gene in the viral RNA genome.

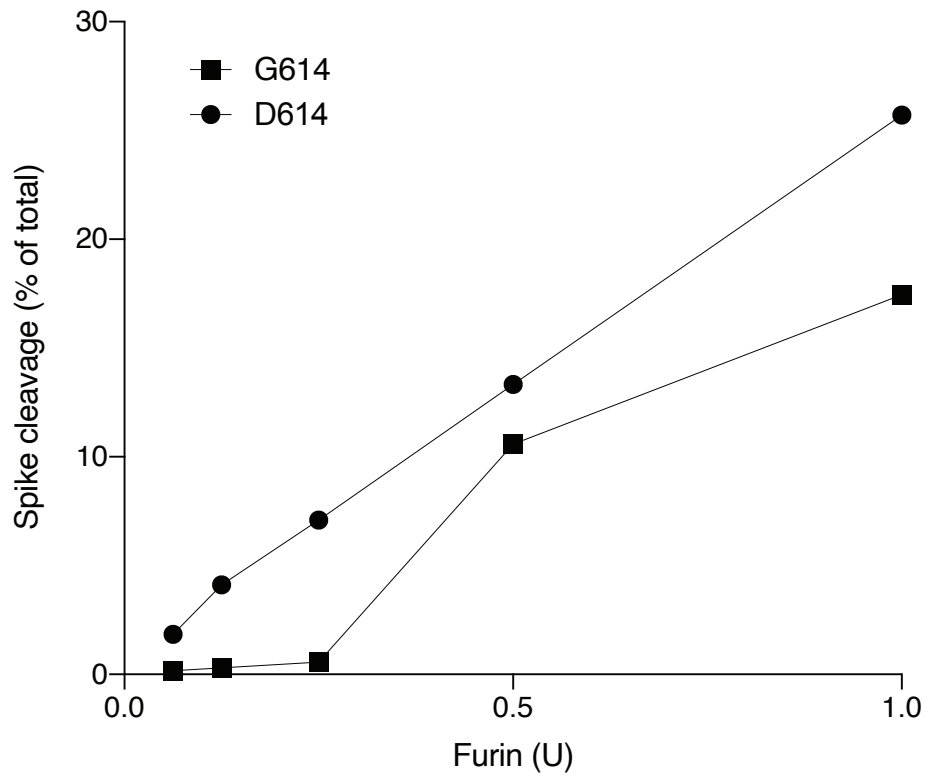

**Supplementary Figure 3. On-bead furin digestion of immunoprecipitated SARS-CoV-2 Spike variants.** Quantification of cleaved Spike (S2) fragment as a percent of total Spike after 1 hour digestion at 37°C with furin protease.

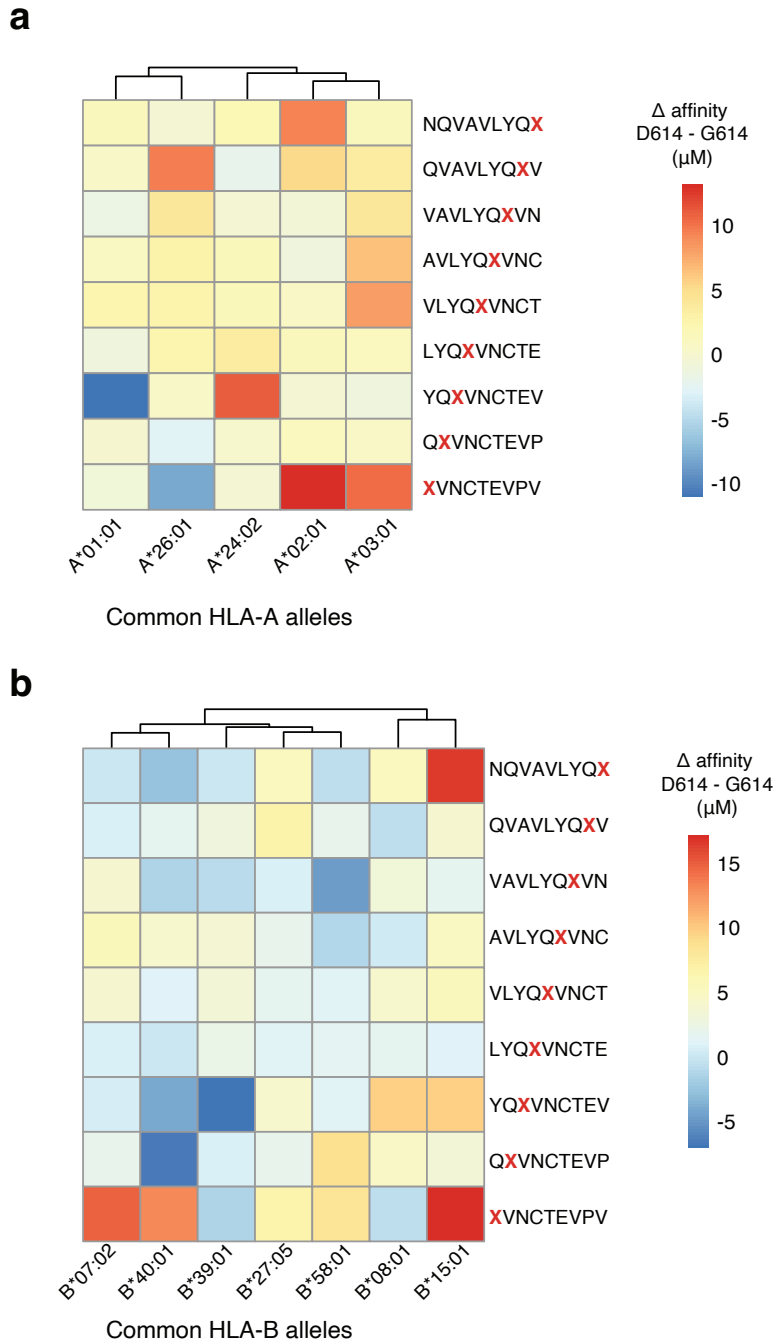

**Supplementary Figure 4. Change in MHC binding affinity for peptides near the D614G mutation in the SARS-CoV-2 spike protein.** Predicted change in binding affinity for common HLA-A alleles (a) and common HLA-B alleles (b). Predictions were computed using the NetMHC software package.
